# Supplementary material for: Long-range cis-regulatory elements controlling GDF6 expression are essential for ear development
Source: JCI journal article supplement (doi:10.1172/jci136951), 2020-05-05
Supplement: sd1 [file 1]

## Supplemental Material

### Supplemental methods:

#### Genome sequencing and bioinformatics

Genome sequencing was performed on Individuals III:1, III:2, III:3, III:4, IV:1, IV:2, IV:3, and IV:4 from Family 1 and IV:1 from Family 2 using Illumina X Ten. Reads were mapped to the human reference genome (NCBI build37/hg 19 version) and variants were called according to standard protocols (1-3). CNVnator was used for copy number variant detection (4). Candidate variants were confirmed with Sanger sequencing and deletion specific PCR. Primers utilized are listed in **Supplemental Table 7**.

#### iPSCs

We derived induced pluripotent stem cells iPSCs from dermal fibroblasts. Fibroblasts from both affected and control individuals were treated with the non-integrating Sendai virus vector carrying the Yamanaka reprogramming factors (MYC, KLF4, OCT4, and SOX2) using the Cytotune® iPS 2.0 Sendai reprogramming Kit (ThermoFisher Scientific) according to the manufacturer's protocol. Seven days post-transduction, we plated the cells on Matrigel® Membrane Matrix (Corning) coated culture dishes and switched from fibroblast media to iPSCs medium (*e.g.*, mTESR1 (StemCell Technologies)). Once colonies emerged, we manually picked individual iPSC colonies based on the similarity of their morphology to embryonic stem cell colonies and expression of the pluripotency marker TRA-1-60 using Human Pluripotent Stem Cell Live Cell Imaging Kit (R&D Systems). We expanded these clonal derived lines and tested the individual clones for pluripotency by ICC and qRT-PCR for OCT4, SOX2, NANOG, TRA-1-60, and TRA-1-81, as well as G-band karyotype to ensure that no gross chromosomal abnormality had arisen during the reprogramming process or expansion of the lines. Loss of the Sendai virus expression construct, which typically occurs within 40 days of transduction, was assessed using TaqMan RT-PCR assays to monitor the expression of Sendai viral vector genes (5-7).

#### Early otic lineage cell differentiation

We generated early otic lineage cells following the protocol of Matsuoka et al (7, 8). We plated iPSCs at low density in Matrigel (Corning Life Sciences) coated plates (10,000 cells/cm<sup>2</sup>) and cultured them in mTESR1 stem cell growth media (StemCell Technologies). On day 3, we switched the media to N2B27-CDM (DMEM/F12 (1:1) containing 1x N2, 1x B27 supplements, 1x non-essential amino acids, 1x Glutamax, 100 uM β-mercaptoethanol) supplemented with 10 ng/mL FGF2, 10 ng/mL BMP4 (Peprotech), and 1 uM of the TGF beta inhibitor SB431542 (Biogen). At this stage, cells were positive for the NNE markers DLX3 and AP2α. On day 6, we changed the supplements to the medium with 10 ng/mL FGF2 (Peprotech), 1 uM SB431542 (Biogen), 2 uM of the WNT inhibitor IWP-2 (Biogen), and 100 nM of the BMP inhibitor LDN193189 (Biogen) to drive formation of the PPE that is positive for EYA1 and p75, with reduced expression of SOX2. On day 11, we harvested the cells by treatment with Accutase™ to form a single cell suspension. Cells were negatively selected for expression of the

pluripotency marker TRA-1-81 and positively for expression of p75 using CD271 magnetic beads, and plated at 25,000 cells/cm<sup>2</sup>.

### **RNA-Seq analysis**

RNA extraction and purification were performed using TRIzol (Invitrogen) and RNeasy Minikit (Qiagen), respectively. We sequenced the transcriptomes of iPSCs and otic progenitor cells derived from patient fibroblasts from the proband (IV:4). We used ASE9203 and CD2 as control cells. We performed RNA-Seq on two clones of the proband and ASE9203 and CD2 as control cells in technical duplicates on days 3, 6 and 11.

Total RNA was quantified and qualified using the Agilent Bioanalyzer to have an RNA integrity score (RIN) set to 9. For RNA preparations, 1000 ng of total RNA was used as input for the Illumina TruSeq Total RNA Library Prep Kit with Ribo-Zero. Each sample had an incorporated unique barcode to allow for multiplexing. For total RNA libraries, ~50 million raw reads were generated in a 2 x 100 paired-end sequencing run.

Raw sequence data from the Illumina NovaSeq 6000 were processed by the on-instrument Real Time Analysis software to basecall files. These were converted to demultiplexed FASTQ files with the Illumina supplied scripts in the BCL2FASTQ software (v1.8.4). Quality of the reads was determined with FASTQC software (<http://www.bioinformatics.babraham.ac.uk/projects/fastqc/>) for per base sequence quality, duplication rates, and overrepresented k-mers. Illumina adapters were trimmed from the ends of the reads using the Trim Galore! Package ([http://www.bioinformatics.babraham.ac.uk/projects/trim\\_galore/](http://www.bioinformatics.babraham.ac.uk/projects/trim_galore/)). Reads were aligned to the human reference genome (hg19) with the STAR aligner (v2.5.0a) (9). Gene count quantification for total RNA was performed using the GeneCounts function within STAR against the GENCODE v19 transcript file. We run RSEM with the STAR aligner to create Fragments Per Kilobase of transcript per Million mapped reads (FPKM) values.

TaqMan assays for *GDF6* (Hs01377663\_m1; labeled with FAM) and *GAPDH* (Hs02758991\_g1; labeled with VIC) were used to confirm gene expression levels.

### **RT-PCR**

To evaluate expression of *Gdf6*, different tissues including lung, kidney, liver, spleen, hippocampus, cortex, kidney, and cochlea were dissected from P15 wildtype mice. In addition, cochlear expression of *Gdf6* was assessed in embryos of 17.5 dpc. Total RNA was isolated with TRIzol Reagent (Invitrogen) according to the manufacturer's instructions. Prior to reverse transcription, RNA samples were treated with rDNase I (DNA-free kit, Applied Biosystems). cDNA was synthesized using qScript XLT cDNA SuperMix (Quanta Biosciences). Primers indicated in **Supplemental Table 7** were used to amplify *Gdf6* and *Gapdh*.

### **Animals**

C57Bl/6:129-Gdf6<sup>tm1Kng/J</sup> mice (10) were cryo-recovered at the Jackson Laboratory (JAX stock #024648). For colony expansion and stock maintenance two backcrosses with wildtype C57Bl/6 mice were done at the University of Miami. At weaning age, mice were genotyped and housed 2-4 per cage in a room with a 12 hour light:dark cycle (lights on at 7 AM, off at 7 PM) with access to food and water *ad*

*libitum*. F2 heterozygous animals were mated in order to obtain the E20 embryos that were utilized for phenotypic characterization.

### Inner ear morphology

To determine whether *Gdf6* mutant mice showed any morphological change in the inner ear, specimens from *Gdf6* wildtype and *Gdf6* mutant mice at P0 were harvested and fixed overnight in Bodian's fixative. Organs were then dehydrated in ethanol and cleared in methyl salicylate. Membranous labyrinths were visualized by injecting 0.1% white latex paint in methyl salicylate as previously described (11).

### Supplemental References:

1. DePristo MA, Banks E, Poplin R, Garimella KV, Maguire JR, Hartl C, et al. A framework for variation discovery and genotyping using next-generation DNA sequencing data. *Nat Genet.* 2011;43(5):491-8.
2. McKenna A, Hanna M, Banks E, Sivachenko A, Cibulskis K, Kernytsky A, et al. The Genome Analysis Toolkit: a MapReduce framework for analyzing next-generation DNA sequencing data. *Genome Res.* 2010;20(9):1297-303.
3. Li H, and Durbin R. Fast and accurate long-read alignment with Burrows-Wheeler transform. *Bioinformatics.* 2010;26(5):589-95.
4. Abyzov A, Urban AE, Snyder M, and Gerstein M. CNVnator: an approach to discover, genotype, and characterize typical and atypical CNVs from family and population genome sequencing. *Genome Res.* 2011;21(6):974-84.
5. Marion RM, Strati K, Li H, Tejera A, Schoeftner S, Ortega S, et al. Telomeres acquire embryonic stem cell characteristics in induced pluripotent stem cells. *Cell Stem Cell.* 2009;4(2):141-54.
6. Polo JM, Liu S, Figueroa ME, Kulalart W, Eminli S, Tan KY, et al. Cell type of origin influences the molecular and functional properties of mouse induced pluripotent stem cells. *Nat Biotechnol.* 2010;28(8):848-55.
7. Huber LJ, and Chao MV. Mesenchymal and neuronal cell expression of the p75 neurotrophin receptor gene occur by different mechanisms. *Dev Biol.* 1995;167(1):227-38.
8. Matsuoka AJ, Morrissey ZD, Zhang C, Homma K, Belmadani A, Miller CA, et al. Directed Differentiation of Human Embryonic Stem Cells Toward Placode-Derived Spiral Ganglion-Like Sensory Neurons. *Stem Cells Transl Med.* 2017;6(3):923-36.
9. Dobin A, Davis CA, Schlesinger F, Drenkow J, Zaleski C, Jha S, et al. STAR: ultrafast universal RNA-seq aligner. *Bioinformatics.* 2013;29(1):15-21.
10. Settle SH, Rountree RB, Sinha A, Thacker A, Higgins K, and Kingsley DM. Multiple joint and skeletal patterning defects caused by single and double mutations in the mouse *Gdf6* and *Gdf5* genes. *Developmental Biology.* 2003;254(1):116-30.
11. Diaz-Horta O, Abad C, Sennaroglu L, Foster J, 2nd, DeSmidt A, Bademci G, et al. ROR1 is essential for proper innervation of auditory hair cells and hearing in humans and mice. *Proc Natl Acad Sci U S A.* 2016;113(21):5993-8.

**Supplemental Table 1:** Genome sequencing coverage statistics of the study subjects.

| Family   | Individual | Average sequencing depth (X) | Coverage 1X (%) | Coverage 4X (%) | Coverage 10X (%) | Coverage 20X (%) |
|----------|------------|------------------------------|-----------------|-----------------|------------------|------------------|
| Family 1 | III:1      | 38.89                        | 99.6            | 99.6            | 99.4             | 96.1             |
| Family 1 | III:2      | 34.85                        | 98.9            | 98.8            | 98.7             | 97.4             |
| Family 1 | III:3      | 33.37                        | 99.7            | 99.6            | 99.2             | 93.9             |
| Family 1 | III:4      | 40.68                        | 99.5            | 99              | 98.7             | 98.3             |
| Family 1 | IV:1       | 39.60                        | 99.6            | 99.6            | 99.4             | 96.3             |
| Family 1 | IV:2       | 39.40                        | 99              | 98.8            | 98.7             | 98.1             |
| Family 1 | IV:3       | 34.65                        | 98.9            | 98.8            | 98.7             | 97.4             |
| Family 1 | IV:4       | 37.55                        | 99.6            | 99.6            | 99.3             | 95.7             |
| Family 2 | IV:1       | 37.07                        | 99.6            | 99.6            | 99.3             | 95.3             |

**Supplemental Table 2:** Parameters used for detecting homozygous runs (Enlis software; <https://www.enlis.com/>).

| Parameter                                                   | Genome Sequencing |
|-------------------------------------------------------------|-------------------|
| Variation types to test                                     | SNPs only         |
| Ignore rare or common variations                            | <5% and >95%      |
| Ignore variations that have a quality score less than       | 20                |
| Consolidate nearby regions                                  | checked           |
| Minimum region length                                       | 50,000 bp         |
| Window scan size                                            | 50 variations     |
| Maximum number heterozygous variants in window scan         | 0                 |
| Percent of windows for homozygous position call             | 5%                |
| Number of consecutive positions to call a homozygous region | 100               |
| Maximum gap between variations in a region                  | 100,000 bp        |

**Supplemental Table 3:** Coverage of homozygous regions (>2 MB) in two affected individuals of Family 1 via genome sequencing. Overlapping regions are in red.

| Family 1, Individual IV:4      |               |          |         |                              | Family 1, Individual IV:1      |               |          |         |                              |
|--------------------------------|---------------|----------|---------|------------------------------|--------------------------------|---------------|----------|---------|------------------------------|
| Chromosome # & Position (hg19) | Region Length | Coverage |         | Average sequencing depth (X) | Chromosome # & Position (hg19) | Region Length | Coverage |         | Average sequencing depth (X) |
|                                |               | 1X (%)   | 10X (%) |                              |                                |               | 1X (%)   | 10X (%) |                              |
| 13:63659389-95376449           | 31717061      | 99.5     | 99.4    | 38.34                        | 7:9486339-32425158             | 22938820      | 100      | 99.9    | 40.11                        |
| 20:30324255-52445502           | 22121248      | 99.7     | 99.7    | 37.96                        | 9:91105090-103764630           | 12659541      | 98       | 97.9    | 40                           |
| 8:92775372-113875795           | 21100424      | 99       | 98.9    | 38.04                        | 12:115679329-127901084         | 12221756      | 99.6     | 99.5    | 40.2                         |
| 8:23888781-43757648            | 19868868      | 99.1     | 99      | 38.15                        | 8:86849171-98195883            | 11346713      | 98.2     | 98      | 39.32                        |
| 3:164435296-180680013          | 16244718      | 100      | 99.9    | 38.33                        | 15:34719415-45094667           | 10375253      | 100      | 99.9    | 40.69                        |
| 13:52263103-63598906           | 11335804      | 99.8     | 99.8    | 38.66                        | 5:34543129-43502947            | 8959819       | 99.9     | 99.9    | 40.17                        |
| 8:46889559-57926726            | 11037168      | 99.8     | 99.8    | 38.46                        | 9:81749354-89653533            | 7904180       | 100      | 99.9    | 40.13                        |
| 13:100635377-110965373         | 10329997      | 100      | 99.9    | 38.4                         | 16:1309074-8928135             | 7619062       | 99.3     | 99.2    | 40.69                        |
| 14:78924499-87983256           | 9058758       | 99.9     | 99.9    | 38.59                        | 15:45337503-52586967           | 7249465       | 99.9     | 99.9    | 40.38                        |
| 14:90679910-97658940           | 6979031       | 100      | 99.9    | 38.18                        | 13:106756228-113082906         | 6326679       | 97.5     | 97.3    | 39.21                        |
| 3:157474574-164059123          | 6584550       | 100      | 99.9    | 38.42                        | 4:70299575-76317295            | 6017721       | 99.5     | 99.3    | 39.51                        |
| 11:61017935-67000950           | 5983016       | 100      | 99.9    | 37.63                        | 12:42514923-47626581           | 5111659       | 99.9     | 99.8    | 40.33                        |
| 11:71281860-76902595           | 5620736       | 99.9     | 99.8    | 38.11                        | 8:81958306-86546030            | 4587725       | 100      | 99.9    | 40.1                         |
| 13:95386766-100567591          | 5180826       | 99.9     | 99.9    | 38.24                        | 5:115380055-119664937          | 4284883       | 99.9     | 99.8    | 39.74                        |
| 8:58150948-62661193            | 4510246       | 100      | 99.9    | 38.53                        | 4:99707017-103640758           | 3933742       | 100      | 99.9    | 40.31                        |
| 11:56482758-60957072           | 4474315       | 100      | 99.9    | 38.43                        | 1:215222115-219055281          | 3833167       | 100      | 99.9    | 39.57                        |
| 13:40302811-44726453           | 4423643       | 100      | 99.8    | 38.5                         | 2:6366461-10086506             | 3720046       | 100      | 99.9    | 40.53                        |
| 11:79480228-83837570           | 4357343       | 100      | 99.9    | 38.6                         | 6:35820544-39212618            | 3392075       | 100      | 99.9    | 40.85                        |
| 1:209304875-213638762          | 4333888       | 100      | 99.9    | 38.28                        | 1:236659617-239925109          | 3265493       | 100      | 99.9    | 39.75                        |
| 4:94719474-99026609            | 4307136       | 100      | 99.9    | 38.5                         | 2:3185407-6267084              | 3081678       | 95.1     | 95      | 37.95                        |
| 9:84336588-88442462            | 4105875       | 100      | 99.9    | 38.49                        | 4:76480880-79513215            | 3032336       | 100      | 99.9    | 40.13                        |
| 14:97774442-101420572          | 3646131       | 100      | 99.9    | 38.1                         | 4:64237289-67116175            | 2878887       | 99.4     | 99.2    | 39.58                        |
| 13:44732330-48237322           | 3504993       | 99.9     | 99.8    | 38.4                         | 5:43513126-46365857            | 2852732       | 99.9     | 99.9    | 41.92                        |
| 13:48389582-51744914           | 3355333       | 99.8     | 99.7    | 38.5                         | 15:55825945-58666679           | 2840735       | 100      | 99.9    | 40.46                        |
| 11:68302101-71243244           | 2941144       | 96.6     | 96.5    | 36.43                        | 21:29425578-32242849           | 2817272       | 100      | 99.9    | 40.42                        |
| 10:13170888-16061958           | 2891071       | 100      | 99.9    | 38.05                        | 19:56358567-59097229           | 2738663       | 100      | 99.9    | 41.57                        |
| 7:155923631-158706407          | 2782777       | 99.9     | 99.4    | 37.15                        | 7:68277408-70990854            | 2713447       | 100      | 99.9    | 39.19                        |
| 14:87998907-90670994           | 2672088       | 100      | 99.9    | 38.31                        | 4:96836048-99528486            | 2692439       | 99.8     | 99.7    | 39.76                        |
| 11:45693984-48334369           | 2640386       | 99.8     | 99.7    | 37.9                         | 16:8937378-11500301            | 2562924       | 100      | 99.8    | 40.41                        |
| 20:52489424-54974993           | 2485570       | 100      | 99.9    | 38.39                        | 5:49625088-52175563            | 2550476       | 100      | 99.9    | 40.19                        |
| 13:37998714-40295129           | 2296416       | 99.9     | 99.9    | 38.63                        | 6:33252115-35753559            | 2501445       | 99.9     | 99.9    | 41.31                        |
| 7:114240116-116312439          | 2072324       | 100      | 100     | 38.55                        | 12:48342098-50652526           | 2310429       | 100      | 99.9    | 41.03                        |

**Supplemental Table 4:** Shared autozygous regions between individuals IV:4 and IV:1 in Family 1.

| Chromosome # & Position (hg19) | Shared Region Length | Family 1, Individual IV:4 |                  |                              | Family 1, Individual IV:1 |                  |                              |
|--------------------------------|----------------------|---------------------------|------------------|------------------------------|---------------------------|------------------|------------------------------|
|                                |                      | Coverage 1X (%)           | Coverage 10X (%) | Average sequencing depth (X) | Coverage 1X (%)           | Coverage 10X (%) | Average sequencing depth (X) |
| 8: 92,775,372-98,195,883       | 5,420,511            | 96.1                      | 95.9             | 36.88                        | 96.3                      | 95.9             | 38.45                        |
| 9: 84,336,588-89,653,533       | 5,316,945            | 100                       | 99.9             | 38.52                        | 100                       | 99.9             | 40.16                        |
| 13:106,756,228-110,965,373     | 4,209,145            | 100                       | 99.9             | 38.34                        | 99.9                      | 99.8             | 40.02                        |
| 4: 96,836,048-99,026,609       | 2,190,561            | 100                       | 100              | 38.56                        | 99.8                      | 99.7             | 39.69                        |

**Supplemental Table 5:** Rare variants segregating within autozygous runs in Family 1.

| Chr # | Position (hg19) | Reference | Alt | Type | ConsDetail        | GeneName             | mamPhCons | verPhCons | CADD* PHRED |
|-------|-----------------|-----------|-----|------|-------------------|----------------------|-----------|-----------|-------------|
| 13    | 108048554       | A         | T   | SNV  | intron            | <i>FAM155A</i>       | 0.001     | 0.001     | 1.321       |
| 13    | 108059787       | C         | T   | SNV  | intron            | <i>FAM155A</i>       | 0.086     | 0.121     | 0.555       |
| 13    | 108077707       | A         | C   | SNV  | intron            | <i>FAM155A</i>       | 0.001     | 0.002     | 3.716       |
| 8     | 93022265        | C         | A   | SNV  | intron            | <i>RUNX1T1</i>       | 0         | 0         | 3.127       |
| 8     | 93333064        | C         | T   | SNV  | intergenic        | NA                   | 0         | 0         | 11.81       |
| 8     | 93453821        | A         | T   | SNV  | intergenic        | NA                   | 0.002     | 0.002     | 2.972       |
| 8     | 93471560        | A         | G   | SNV  | intergenic        | NA                   | 0.11      | 0.221     | 9.094       |
| 8     | 93484030        | G         | A   | SNV  | intergenic        | NA                   | 0         | 0         | 3.732       |
| 8     | 93512618        | T         | C   | SNV  | downstream        | <i>RP11-587H10.1</i> | 0.003     | 0.004     | 7.659       |
| 8     | 93842879        | T         | C   | SNV  | intron,non coding | <i>RP11-100L22.2</i> | 0         | 0         | 2.729       |
| 8     | 94101844        | T         | A   | SNV  | intergenic        | NA                   | 0.001     | 0.001     | 4.4         |
| 8     | 94144787        | T         | A   | SNV  | downstream        | <i>C8orf87</i>       | 0.002     | 0.005     | 3.328       |
| 8     | 94320734        | C         | T   | SNV  | intron,non coding | <i>LINC00535</i>     | 0.001     | 0.001     | 1.324       |
| 8     | 94333785        | T         | C   | SNV  | intron,non coding | <i>LINC00535</i>     | 0         | 0         | 1.162       |
| 8     | 94429249        | T         | A   | SNV  | intron,non coding | <i>LINC00535</i>     | 0         | 0         | 3.157       |
| 8     | 95220647        | C         | G   | SNV  | intron            | <i>CDH17</i>         | 0.004     | 0.005     | 4.876       |
| 8     | 95222961        | A         | G   | SNV  | upstream          | <i>CDH17</i>         | 0.019     | 0.025     | 3.514       |
| 8     | 95249876        | A         | G   | SNV  | intergenic        | NA                   | 0         | 0         | 5.025       |
| 8     | 95492684        | C         | T   | SNV  | intergenic        | NA                   | 0.009     | 0.01      | 0.83        |
| 8     | 96060679        | A         | T   | SNV  | intron            | <i>NDUFAF6</i>       | 0.145     | 0         | 11.46       |
| 8     | 96111765        | G         | A   | SNV  | intron,non coding | <i>NDUFAF6</i>       | 0.006     | 0.007     | 2.358       |
| 8     | 96573358        | C         | G   | SNV  | intron,non coding | <i>KB-1047C11.2</i>  | 0.001     | 0.001     | 1.237       |
| 8     | 97191568        | T         | C   | SNV  | intergenic        | NA                   | 0.007     | 0.008     | 11.67       |
| 8     | 97298334        | C         | T   | SNV  | intron            | <i>PTDSS1</i>        | 0         | 0         | 4.176       |
| 8     | 97335444        | G         | A   | SNV  | intron            | <i>PTDSS1</i>        | 0.001     | 0.001     | 0.046       |
| 8     | 97481231        | C         | T   | SNV  | intergenic        | NA                   | 0.001     | 0.001     | 3.655       |
| 8     | 97791652        | A         | G   | SNV  | intron            | <i>CPQ</i>           | 0.001     | 0.001     | 3.702       |
| 8     | 98002717        | T         | C   | SNV  | intron            | <i>CPQ</i>           | 0.199     | 0.268     | 8.29        |
| 8     | 98077066        | T         | C   | SNV  | intron            | <i>CPQ</i>           | 0         | 0         | 4.648       |
| 8     | 98176496        | C         | T   | SNV  | intergenic        | NA                   | 0.146     | 0.178     | 0.162       |
| 8     | 96023063        |           | G   | INS  | intron            | <i>NDUFAF6</i>       | 0.002     | 0.002     | NA          |
| 8     | 97061381        | A         |     | DEL  | intergenic        | NA                   | 0.206     | 0.331     | NA          |

\*CADD: Combined Annotation Dependent Depletion. CADD score is &lt;15 for all variants.

**Supplemental Table 6:** Outcome of variant filtering in Family 1.

|                                                                            | SNVs            |                 | CNVs                        |                             |
|----------------------------------------------------------------------------|-----------------|-----------------|-----------------------------|-----------------------------|
|                                                                            | Individual IV:1 | Individual IV:4 | Individual IV:1             | Individual IV:4             |
| Total Number of Variants                                                   | 6,580,399       | 6,567,417       | 4,782<br>(1,543 del<br>CNV) | 4,571<br>(1,529 del<br>CNV) |
| # of homozygous variants in shared homozygous regions (MAF <0.0007 gnomAD) | 911             | 789             | 2                           | 2                           |
| # of variants not in internal controls and segregating in the family       | 32              |                 | 1                           |                             |
| # of conserved variants mamPhCons and verPhCons >0.4                       | 0               |                 | -                           |                             |

**Supplemental Table 7:** Sequences of primers used for analysis.

| Primer Name     | Sequence 5' to 3'        | Amplicon size (bp) | Description                                                                         |
|-----------------|--------------------------|--------------------|-------------------------------------------------------------------------------------|
| m_Gdf6_F        | GCGCTTCACCTTACCTCAAG     | 198                | Primers used for gene expression in mice                                            |
| m_Gdf6_R        | GGACGAAATCTTTCCTGTCG     |                    |                                                                                     |
| m_Gapdh_F       | AGGTCGGTGTGAACGGATTTG    | 129                | Primers used for gene expression in mice                                            |
| m_Gapdh_R       | TGTAGACCATGTAGTTGAGGTCA  |                    |                                                                                     |
| Fam1_brk_F      | TTGGAGGTTTTCCCTCCTCT     | 425                | Family 1 deletion-specific primers                                                  |
| Fam1_brk_R      | AATGTCAACCCCTGTCCATC     |                    |                                                                                     |
| Fam1_brk crt1_F | AGGTTATCCAATTTGTTGTCCTGT | 330                | Family 1 deletion breakpoint wildtype 1                                             |
| Fam1_brk crt1_R | CAAAGTGAGCAGGAGGAAGG     |                    |                                                                                     |
| Fam1_brk crt2_F | AGGGAGGACATGACAACAGTCT   | 309                | Family 1 deletion breakpoint wildtype 2                                             |
| Fam1_brk crt2_R | TCAAGCTAATTGGGGCAAAC     |                    |                                                                                     |
| Del_wildtype_F  | TCCACCTTGACAAGATCAACC    | 307                | Primers amplifying a region inside the overlapping (Family 1 and Family 2) deletion |
| Del_wildtype_R  | AAAAATGCACCAGGACAAG      |                    |                                                                                     |
| Fam2_brk_F      | TGCAGCTGAGACGAGAGAGA     | 269                | Family 2 deletion-specific primers                                                  |
| Fam2_brk_R      | ATCAGTCCCAGGCTTGCTAA     |                    |                                                                                     |
| Fam2_brk crt1_F | CTGACCAAGAGGTCAAATGGA    | 592                | Family 2 deletion breakpoint wildtype 1                                             |
| Fam2_brk crt1_R | AACAAGGAGGCATTCACACC     |                    |                                                                                     |
| Fam2_brk crt2_F | TGCCTGTCTCATGGTCAGAA     | 654                | Family 2 deletion breakpoint wildtype 2                                             |
| Fam2_brk crt2_R | ATCAGTCCCAGGCTTGCTAA     |                    |                                                                                     |

**A**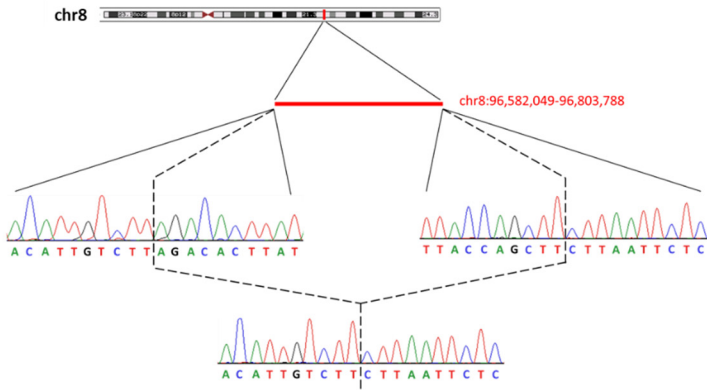**B**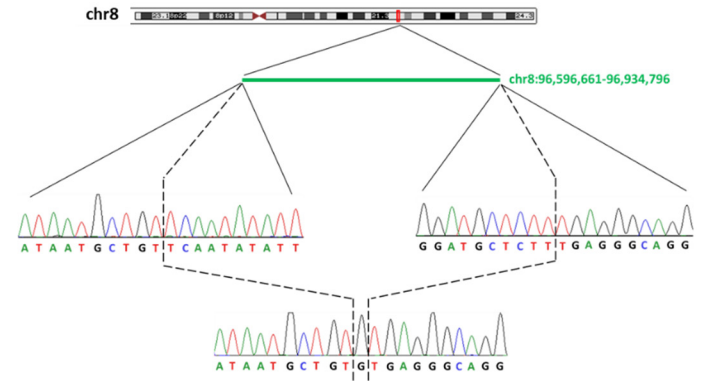

**Supplemental Figure 1:** Sanger sequencing confirmation of breakpoints. **A)** Electropherogram shows Family 1 seq[GRCh37] del(8)(q22.1(96,582,048)::q22.1(96,803,789)) deletion breakpoints. **B)** Electropherogram shows Family 2 seq[GRCh37] del(8)(q22.1(96,596,660)::G::q22.1(96,934,797)) deletion breakpoints.



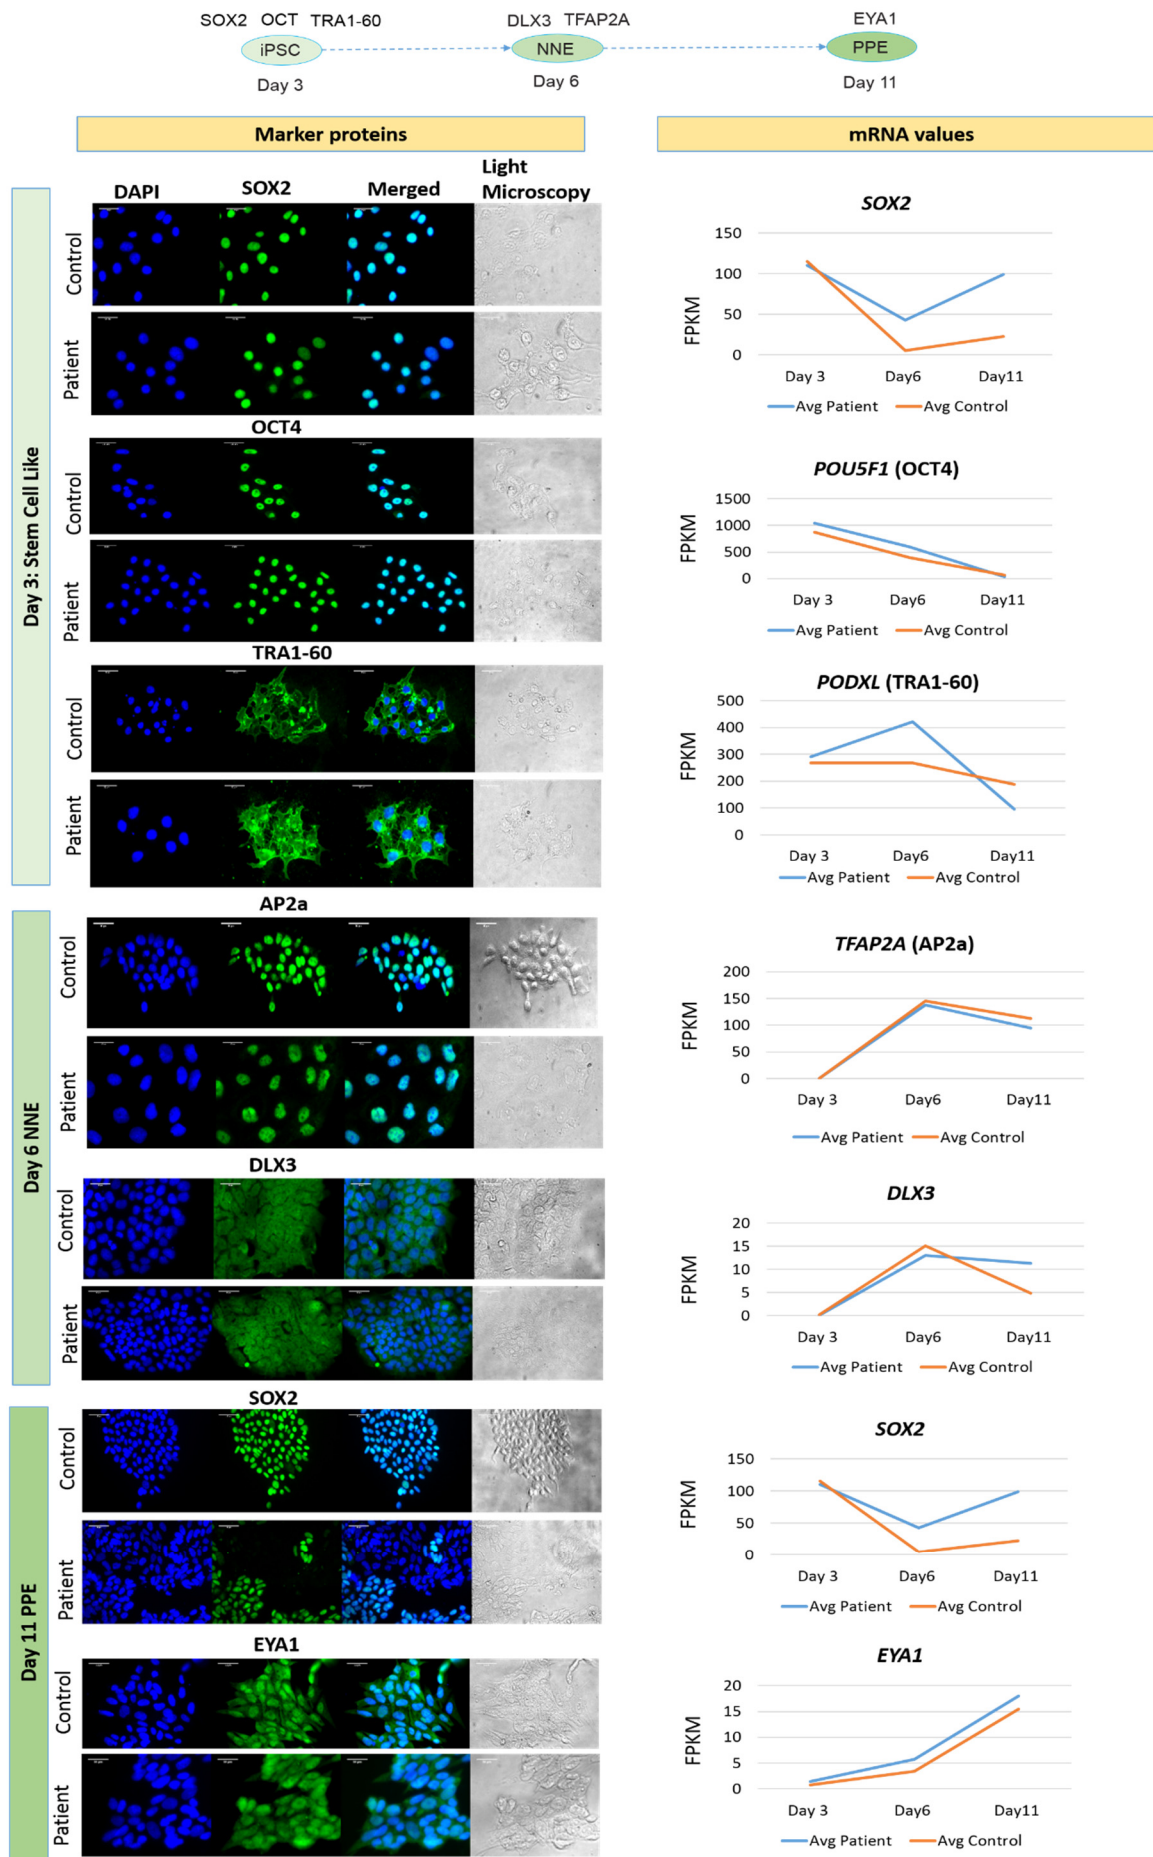

**Supplemental Figure 2:** Summary of expression levels of markers specific for otic progenitor cell differentiation steps. RNA-seq for expression of each gene is represented by using FPKM values on Y axis.

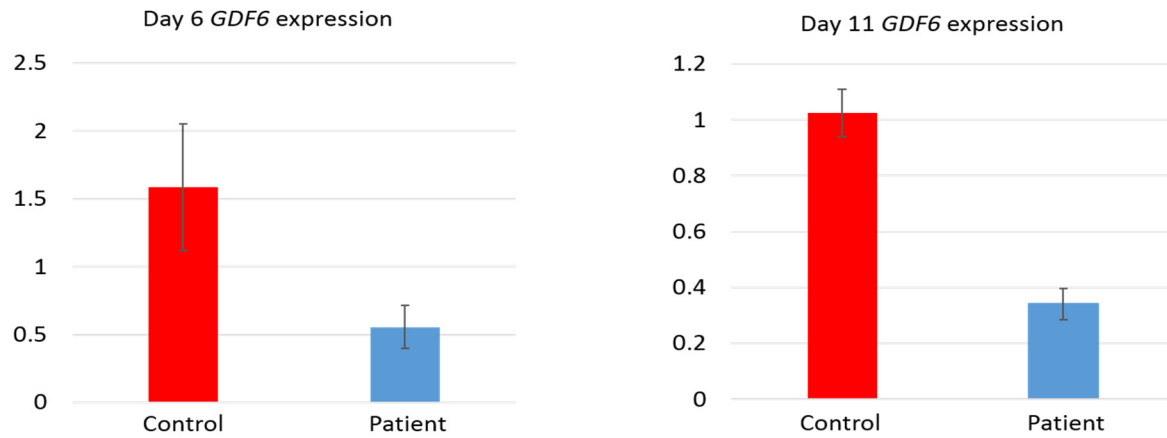

**Supplemental Figure 3:** Confirmatory *GDF6* expression levels on Days 6 and 11 performed by TaqMan probes. There is statistical difference for expression levels on Day 11 between control and patient cells (n= 8 cases; n=8 controls,  $p < 0.001$  via independent samples Mann Whitney U test).

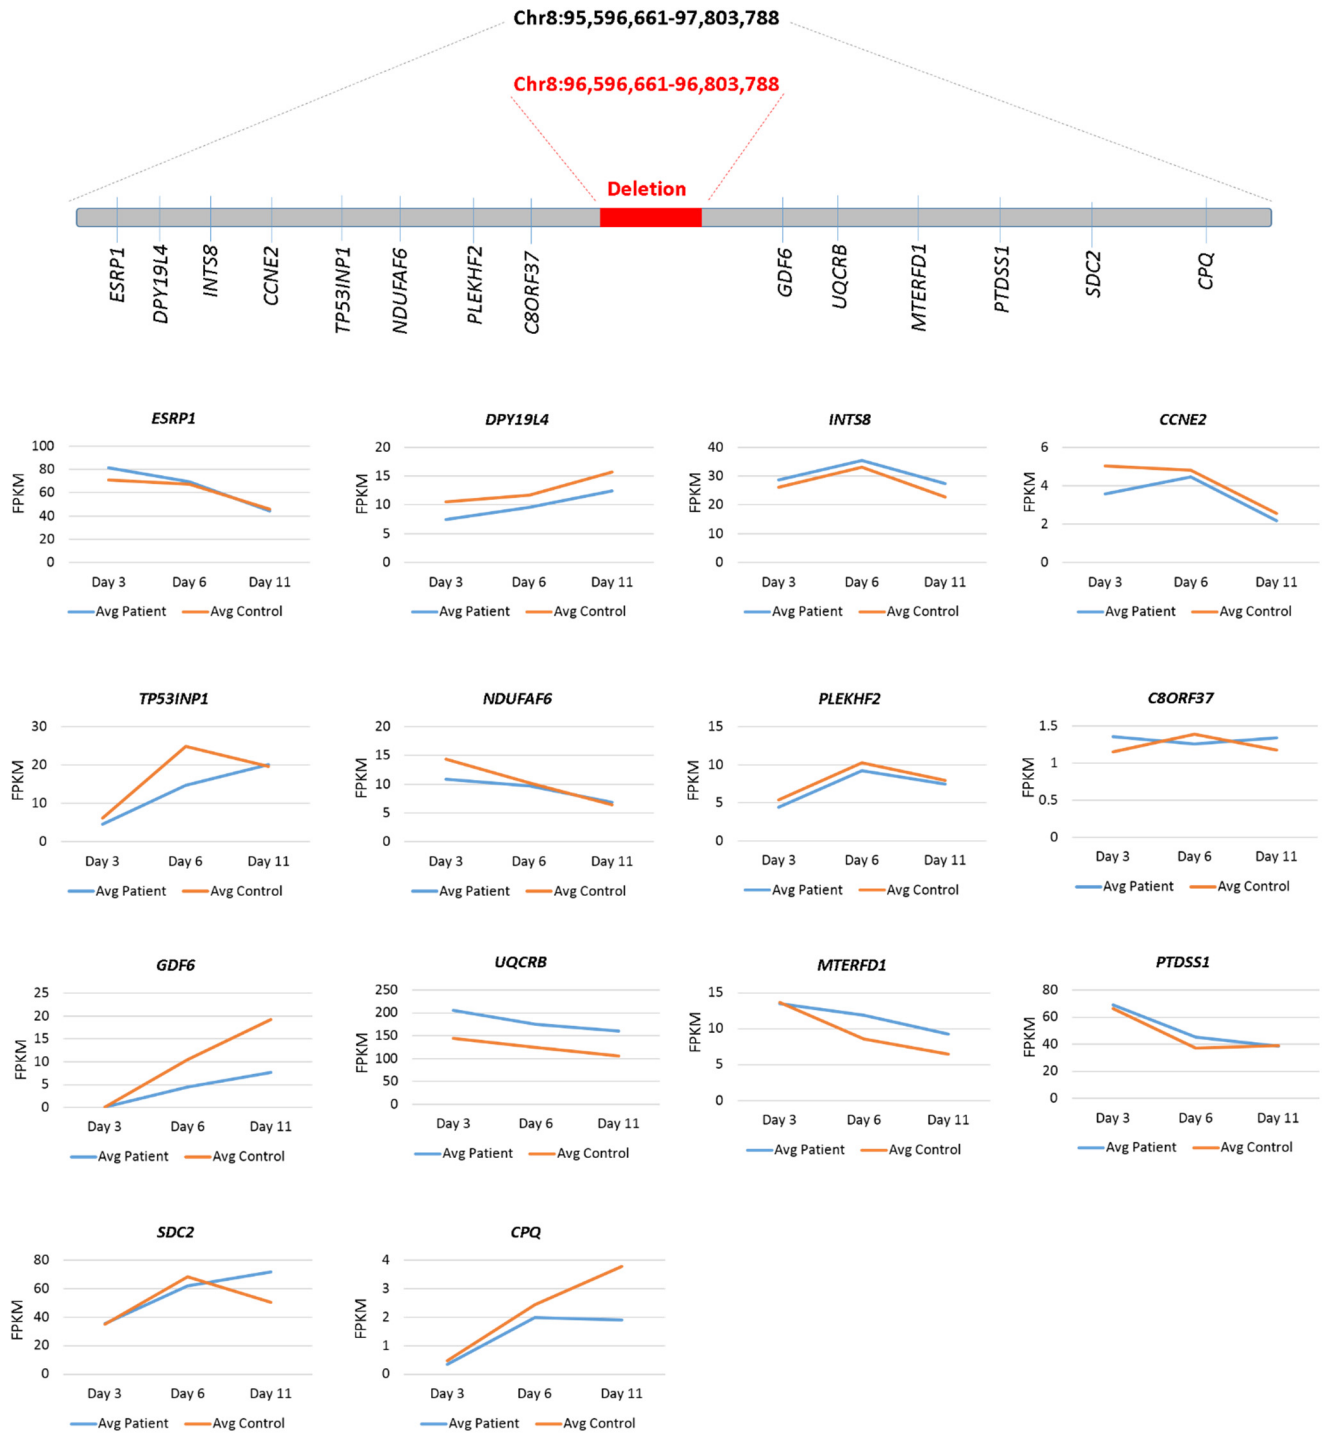

**Supplemental Figure 4:** Expression values for genes located in 1 MB flanking region of the homozygous deletions (Y axis = FPKM, X axis= Days). There is no statistical difference for any gene except for *GDF6* between patient and control cells.

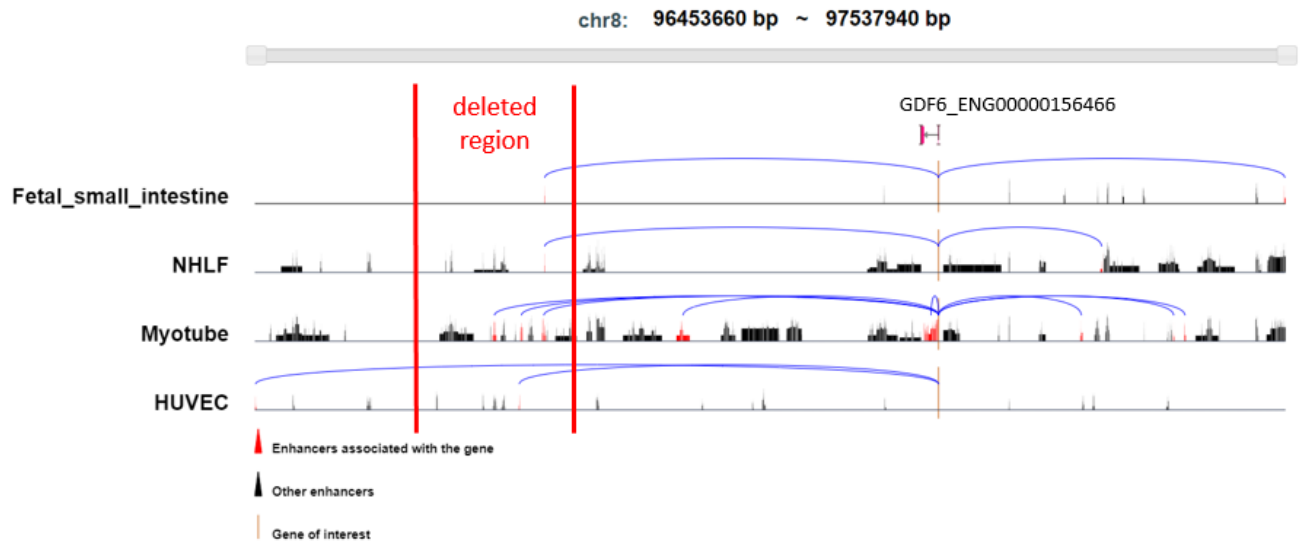

| Cell type             | Enhancer ID | Enhancer Position (hg19) | Transcript ID   | Confidence Score |
|-----------------------|-------------|--------------------------|-----------------|------------------|
| Fetal_small_intestine | E19-12413   | chr8:96758350-96759000   | ENST00000287020 | 0.856            |
| NHLF                  | E08-10027   | chr8:96758290-96758960   | ENST00000287020 | 0.856            |
| Myotube               | E24-17395   | chr8:96703960-96707630   | ENST00000287020 | 0.732            |
| Myotube               | E24-17396   | chr8:96733040-96735310   | ENST00000287020 | 0.836            |
| Myotube               | E24-17398   | chr8:96755600-96760000   | ENST00000287020 | 0.864            |
| HUVEC                 | E03-17997   | chr8:96731420-96732470   | ENST00000287020 | 0.866            |

**Supplemental Figure 5:** Representation of the predicted interactions between *GDF6* promoter and enhancers in deleted region by using EnhancerAtlas (<http://www.enhanceratlas.org/>). NHLF: Normal human lung fibroblasts; HUVEC: Human Umbilical Vein Cells.

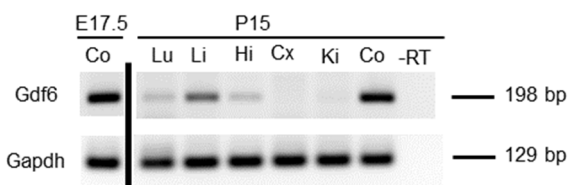

**Supplemental Figure 6:** Expression and localization of *Gdf6* in mouse tissues and cochlea. Expression of *Gdf6* in the mouse was confirmed by RT-PCR. Expression in cochlea at E17.5 and P15 is demonstrated by amplification of a 198 bp fragment with specific primers for *Gdf6*. *Gapdh* amplification was utilized as positive control. At P15, expression of *Gdf6* is present in lung (Lu), liver (Li), hippocampus (Hi), cortex (Cx), kidney (Ki), and cochlea (Co) with high expression. Lanes were run on the same gel but were noncontiguous.

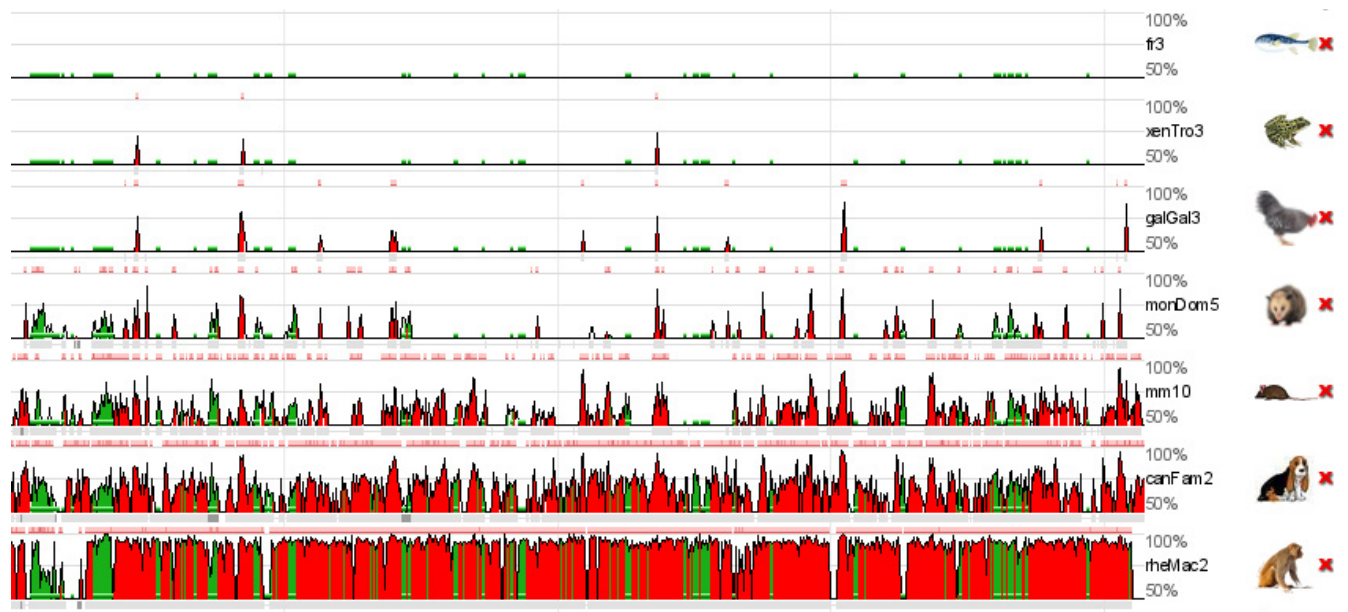

**Supplemental Figure 7:** Figure represents Evolutionary Conserved Regions (ECRs) in the overlapping deleted genomic region (chr8:96,596,661-96,803,788) through species by using ECR Browser (<https://ecrbrowser.dcode.org/>). Human hg19 genome used as a base reference for comparison.

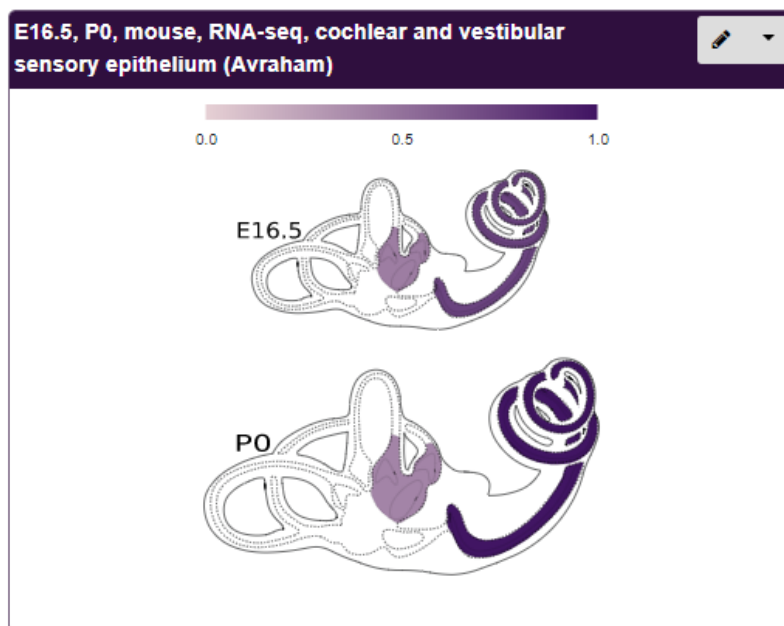

**Supplemental Figure 8:** Figure represents Cochlear and vestibular expression of *Gdf6* (data from Rudnicki et al., 2014) by using gene Expression Analysis Resource (gEAR; <https://umgear.org/>).
